# Supplementary material for: Towards a predictive model for polymer solubility using the noncovalent interaction index: polyethylene as a case study
Source: Royal Society of Chemistry journal article supplement (doi:10.1039/d1cp04346c), 2021-01-01
Supplement: d1cp04346c2.pdf [file d1cp04346c2.pdf]

## Towards a Predictive Model for Polymer Solubility Using the NCI Index: Polyethylene as a Case Study

### Supporting Information

Mats Denayer,<sup>a</sup> Jelle Vekeman,<sup>‡a</sup> Frederik Tielens<sup>a</sup> and Frank De Proft<sup>a,\*</sup>

<sup>a</sup> *Eenheid Algemene Chemie (ALGC), Vrije Universiteit Brussel, Pleinlaan 2, 1050 Brussel, Belgium*

<sup>‡</sup> Current Adress: Center for Molecular Modeling (CMM), Ghent University Technologiepark 46, 9052 Zwijnaarde, Belgium

\* fdeprof@vub.be

#### S1. Plot of dictane's solvent accessible surface area in anisole and methanol vs. the simulation time starting from a slightly bended coil

In the figure below (Figure S1), it is seen that the system immediately evolves towards its most stable state, as opposed to what is seen in Figure 2 and 3 (main text) for the extended coils. It should be noted that the chain in methanol solvent immediately evolves to its collapsed state as discussed in the text, and, importantly, the bended coil in anisole immediately evolves towards its more stable extended state.

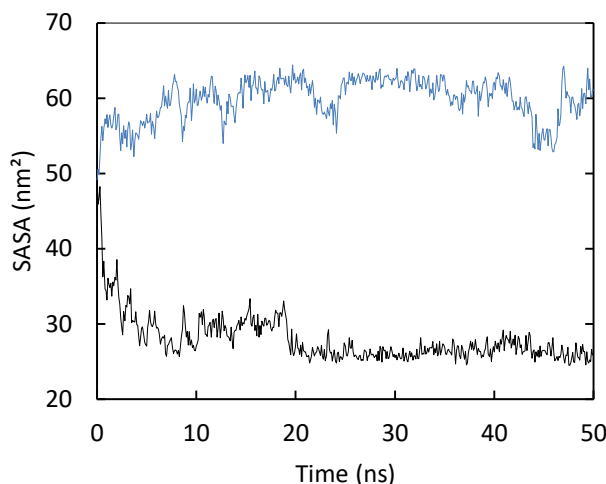

Figure S1: Plot of dictane's solvent accessible surface area in anisole (blue) and methanol (black) vs. the simulation time starting from a slightly bended coil.

#### S2. Conformational analysis of dictane in methanol

Figure S2 shows the evolution of the radius of gyration,  $R_g$ , in different simulations of dictane in methanol starting from differently bended chains (green, light green, yellow, light yellow), whereby three chains were bended manually, while one was bended via a 50 ps NPT simulation in vacuum, in comparison with simulations that started from an extended chain (red and orange), in analogy with what is shown in Figure 4 for the SASA (main text). The radius of gyration was computed as the root

mean squared distance of each point on the coil from its centre of mass, thus representing the size of the polymer coil in the solution

$$R_g = \left( \frac{\sum_i \| \mathbf{r}_i \|^2 m_i}{\sum_i m_i} \right)^{1/2} \quad (\text{S1})$$

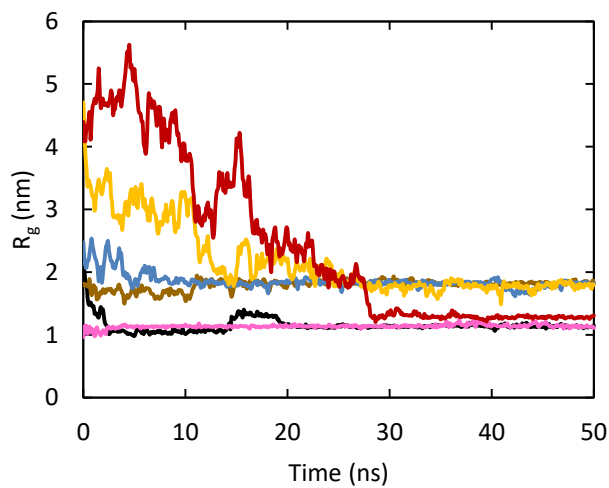

Figure S2: Plot of dictane's radius of gyration, starting from fully extended coils (red and orange) and randomly bended coils (blue, black, brown and pink) in methanol vs. the simulation time.

### S3. Numerical values for the SASA and $I_{NCI}$ in anisole and methanol

Table S1: Summary of the calculated integrated NCI density (in a.u.) and solvent accessible surface area (in nm<sup>2</sup>) at equilibrium.

| Alkane       | # C atoms | Anisole   |       | Methanol  |       |
|--------------|-----------|-----------|-------|-----------|-------|
|              |           | $I_{NCI}$ | SASA  | $I_{NCI}$ | SASA  |
| Propane      | 3         | 0.77      | 2.14  | 0.41      | 2.13  |
| Butane       | 4         | 0.86      | 2.45  | 0.62      | 2.46  |
| Pentane      | 5         | 0.97      | 2.79  | 0.64      | 2.72  |
| Hexane       | 6         | 1.04      | 3.03  | 0.82      | 3.07  |
| Heptane      | 7         | 1.26      | 3.40  | 0.86      | 3.35  |
| Octane       | 8         | 1.46      | 3.69  | 0.94      | 3.70  |
| Nonane       | 9         | 1.61      | 4.00  | 1.09      | 3.96  |
| Decane       | 10        | 1.63      | 4.16  | 1.16      | 4.26  |
| Pentadecane  | 15        | 2.38      | 5.75  | 1.67      | 5.69  |
| Icosane      | 20        | 3.10      | 7.32  | 2.25      | 7.36  |
| Tetracontane | 40        | 6.12      | 13.43 | 3.95      | 13.30 |
| Pentacontane | 50        | 7.41      | 16.25 | 5.18      | 16.65 |
| Hexacontane  | 60        | 8.38      | 17.81 | 5.98      | 19.51 |
| Octacontane  | 80        | 10.99     | 25.90 | 6.46      | 20.75 |
| Hectane      | 100       | 15.07     | 31.84 | 6.96      | 20.02 |
| Dictane      | 200       | 29.95     | 61.22 | 9.97      | 27.21 |

### S4. Numerical values of the calculated $\Delta I_{NCI}$ value shown in Figure 8 (main text).

Table S2 : Summary of the  $\Delta I_{NCI}$  values (in a.u.) for the solvation of the studied alkanes in anisole and methanol.

|              | Anisole | Methanol |
|--------------|---------|----------|
| Propane      | 0.76    | 0.40     |
| Butane       | 0.82    | 0.60     |
| Pentane      | 0.93    | 0.55     |
| Hexane       | 0.93    | 0.74     |
| Heptane      | 1.16    | 0.74     |
| Octane       | 1.34    | 0.83     |
| Nonane       | 1.46    | 0.91     |
| Decane       | 1.32    | 0.97     |
| Pentadecane  | 2.03    | 1.31     |
| Icosane      | 2.66    | 1.89     |
| Tetracontane | 5.24    | 2.93     |
| Pentacontane | 6.14    | 4.13     |
| Hexacontane  | 6.69    | 4.51     |
| Octacontane  | 9.17    | 3.73     |
| Hectane      | 12.82   | 2.02     |
| Dictane      | 25.00   | -4.98    |

**S5. Numerical values for the integrated NCI densities calculated over similar 50 ps NCI trajectories as done for the calculation of the  $I_{\text{NCI}}$  values given in Table S1, but here with the solute's atomic coordinates frozen.**

The figure below (Figure S3) compares the integrated NCI density values given in Table S1,  $I_{\text{NCI,free}}$ , to the integrated NCI density values calculated over similar 50 ps NCI trajectories but with the solute's atomic coordinates frozen,  $I_{\text{NCI,freeze}}$  (numerical values in Table S3). It shows that nearly perfect correlation exists between both quantities on a 1:1 ratio. These results put confidence in using fixed coordinates for the computation of the relative integrated NCI density.

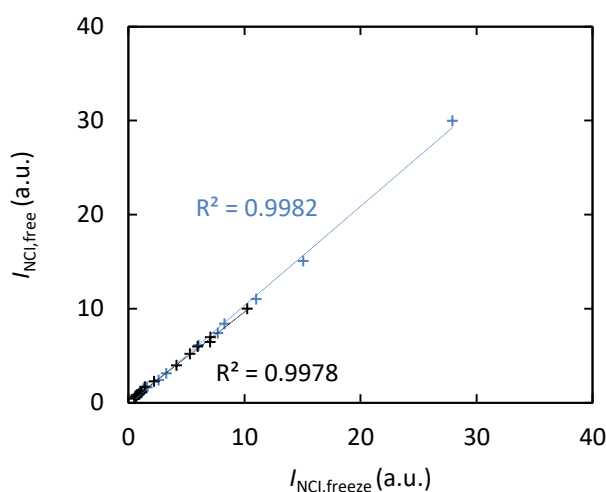

Figure S3: Correlation between the  $I_{\text{NCI,free}}$  and  $I_{\text{NCI,freeze}}$  values in anisole (blue) and methanol (black).

Table S3: Summary of the calculated integrated NCI density at equilibrium while keeping the solute's geometry frozen.

|              | Anisole | Methanol |
|--------------|---------|----------|
| propane      | 0.64    | 0.50     |
| butane       | 0.94    | 0.59     |
| pentane      | 0.94    | 0.70     |
| hexane       | 1.13    | 0.72     |
| heptane      | 1.27    | 0.87     |
| octane       | 1.30    | 0.94     |
| nonane       | 1.60    | 1.08     |
| decane       | 1.58    | 1.14     |
| pentadecane  | 2.60    | 1.42     |
| icosane      | 3.25    | 2.20     |
| tetracontane | 6.05    | 4.13     |
| pentacontane | 7.69    | 5.31     |
| hexacontane  | 8.27    | 5.97     |
| octacontane  | 11.00   | 7.04     |
| hectane      | 15.07   | 7.06     |
| dictane      | 27.92   | 10.24    |
